# Supplementary material
Source: HighWire-hosted journal article supplement (https://genome.cshlp.org/content/suppl/2004/02/26/2019804)

*mel* > *sim* ■    *mel* < *sim* ■    *mel* = *sim* ■

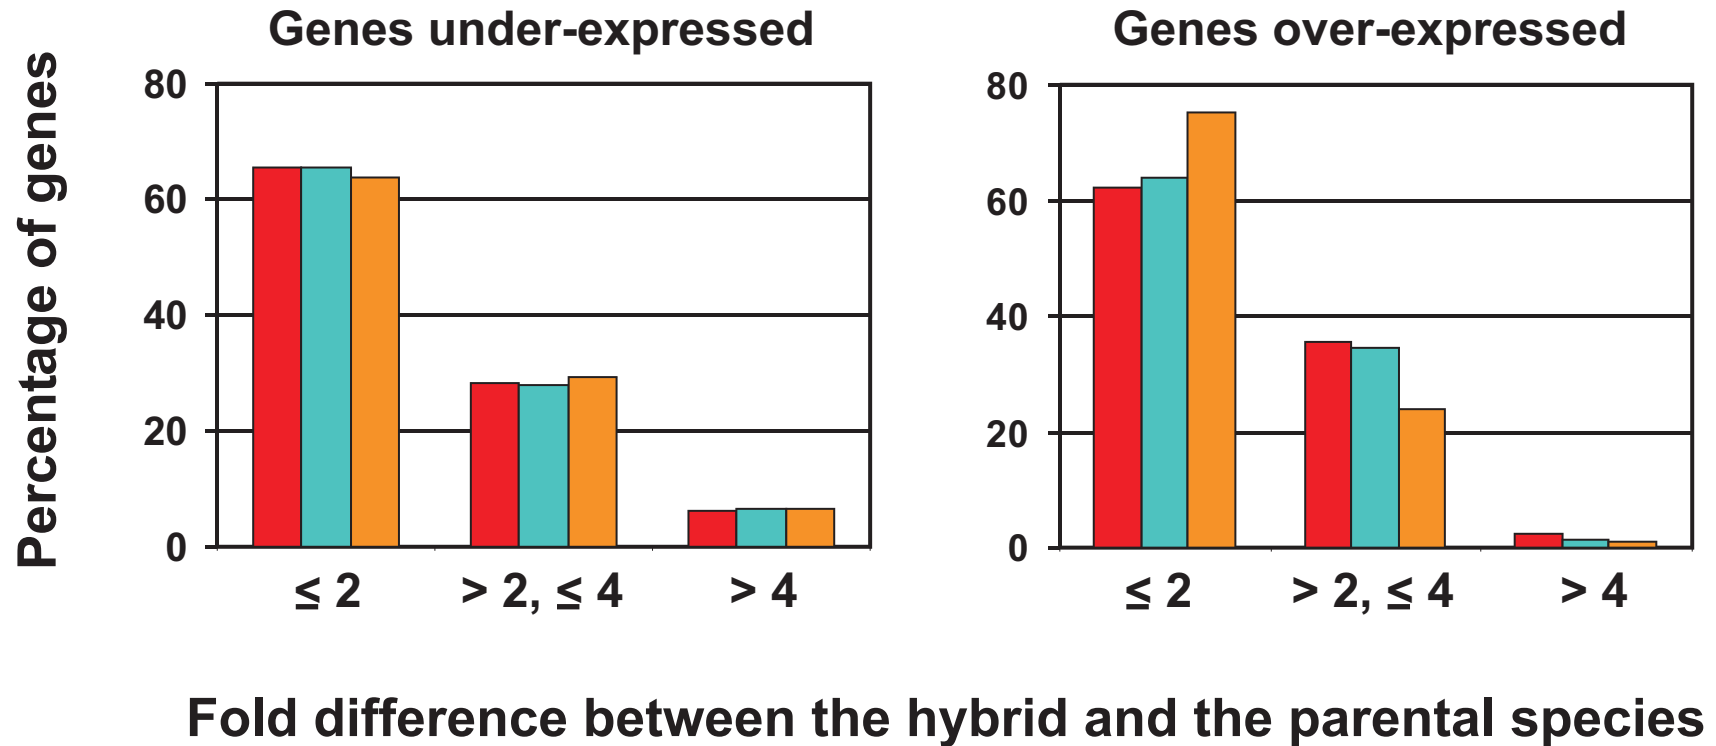

Supplementary Fig. 1 online. Ranz et al.

Supplement: Ranz-20198_Supp_fig_1.pdf [file Ranz-20198_Supp_fig_1.pdf]
